# Supplementary material for: All Things Being Equal: Spatiotemporal Differences between Open and Women&rsquo;s 16-Goal Polo
Source: Preprints.org preprint supplement (doi:10.20944/preprints201908.0308.v1), 2019-08-29
Supplement: Supplementary file 1 [file supplementary]

**Table 1 Results of factorial ANOVA for Open Polo; Significant *p* values are presented in bold. All raw differences are calculated as WIN-LOSS. Raw differences are not provided for interaction effects. Magnitudes of effect sizes are denoted by the following symbols: \*: Small; # Moderate; †: Large; ‡: Very Large.**

| Variable                  | Comparison           | F                        | <i>p</i> value | Raw difference |               | CL        |               | ES            |
|---------------------------|----------------------|--------------------------|----------------|----------------|---------------|-----------|---------------|---------------|
| Duration (min:s)          | <b>Chukka</b>        | <b>F (1,126) = 5.82</b>  | <b>0.017</b>   | <b>-01:06</b>  | <b>-02:00</b> | <b>to</b> | <b>-00:11</b> | <b>-0.43*</b> |
|                           | <b>Game</b>          | <b>F (1,126) = 36.30</b> | <b>0.000</b>   | <b>02:45</b>   | <b>01:51</b>  | <b>to</b> | <b>03:39</b>  | <b>1.08#</b>  |
| Distance (m)              | Chukka x Game        | F (1,126) = 0.19         | 0.666          |                |               |           |               | 0.06          |
|                           | <b>Chukka</b>        | <b>F (1,126) = 5.80</b>  | <b>0.018</b>   | <b>-231.2</b>  | <b>-421.3</b> | <b>to</b> | <b>-41.2</b>  | <b>-0.43*</b> |
|                           | <b>Game</b>          | <b>F (1,126) = 19.95</b> | <b>0.000</b>   | <b>429.0</b>   | <b>238.9</b>  | <b>to</b> | <b>619.0</b>  | <b>0.80#</b>  |
| Distance Speed Zone 1 (m) | <b>Chukka x Game</b> | <b>F (1,126) = 3.96</b>  | <b>0.049</b>   |                |               |           |               | <b>0.35*</b>  |
|                           | <b>Chukka</b>        | <b>F (1,126) = 6.55</b>  | <b>0.012</b>   | <b>-67.3</b>   | <b>-119.4</b> | <b>to</b> | <b>-15.3</b>  | <b>-0.45*</b> |
|                           | <b>Game</b>          | <b>F (1,126) = 28.47</b> | <b>0.000</b>   | <b>140.4</b>   | <b>88.3</b>   | <b>to</b> | <b>192.4</b>  | <b>0.95#</b>  |
| Distance Speed Zone 2 (m) | Chukka x Game        | F (1,126) = 0.045        | 0.833          |                |               |           |               | 0.00          |
|                           | Chukka               | F (1,126) = 1.46         | 0.229          | -46.5          | -122.7        | to        | 29.7          | 0.21*         |
|                           | <b>Game</b>          | <b>F (1,126) = 4.29</b>  | <b>0.041</b>   | <b>79.5</b>    | <b>3.4</b>    | <b>to</b> | <b>155.7</b>  | <b>0.37*</b>  |
| Distance Speed Zone 3 (m) | Chukka x Game        | F (1,126) = 0.89         | 0.346          |                |               |           |               | 0.16          |
|                           | Chukka               | F (1,126) = 2.25         | 0.136          | -61.3          | -142.3        | to        | 19.6          | 0.27*         |
|                           | <b>Game</b>          | <b>F (1,126) = 3.05</b>  | <b>0.083</b>   | <b>71.4</b>    | <b>-9.5</b>   | <b>to</b> | <b>152.4</b>  | <b>0.31*</b>  |
| Distance Speed Zone 4 (m) | Chukka x Game        | F (1,126) = 0.64         | 0.424          |                |               |           |               | 0.14          |
|                           | Chukka               | F (1,126) = 0.16         | 0.690          | -19.4          | -115.3        | to        | 76.6          | 0.06          |
|                           | <b>Game</b>          | <b>F (1,126) = 3.15</b>  | <b>0.079</b>   | <b>86.0</b>    | <b>-10.0</b>  | <b>to</b> | <b>181.9</b>  | <b>0.31*</b>  |
| Distance Speed Zone 5 (m) | <b>Chukka x Game</b> | <b>F (1,126) = 4.94</b>  | <b>0.028</b>   |                |               |           |               | <b>0.39*</b>  |
|                           | Chukka               | F (1,126) = 2.69         | 0.104          | -37.2          | -82.2         | to        | 7.7           | 0.29*         |
|                           | <b>Game</b>          | <b>F (1,126) = 5.18</b>  | <b>0.025</b>   | <b>51.7</b>    | <b>6.7</b>    | <b>to</b> | <b>96.6</b>   | <b>0.40*</b>  |
| Average Speed (km/h)      | Chukka x Game        | F (1,126) = 0.13         | 0.717          |                |               |           |               | 0.06          |
|                           | Chukka               | F (1,126) = 0.45         | 0.503          | 0.33           | -0.63         | to        | 1.29          | 0.12          |
|                           | <b>Game</b>          | <b>F (1,126) = 7.91</b>  | <b>0.006</b>   | <b>-1.37</b>   | <b>-2.33</b>  | <b>to</b> | <b>-0.40</b>  | <b>0.50*</b>  |
| Maximum Speed (km/h)      | Chukka x Game        | F (1,126) = 0.80         | 0.373          |                |               |           |               | 0.16          |
|                           | Chukka               | F (1,126) = 2.32         | 0.130          | -1.14          | -2.63         | to        | 0.34          | 0.27*         |
|                           | <b>Game</b>          | <b>F (1,126) = 0.71</b>  | <b>0.400</b>   | <b>0.63</b>    | <b>-0.85</b>  | <b>to</b> | <b>2.12</b>   | <b>0.16</b>   |
| Sprints                   | Chukka x Game        | F (1,126) = 0.66         | 0.419          |                |               |           |               | 0.14          |
|                           | Chukka               | F (1,126) = 0.89         | 0.347          | -1.2           | -3.6          | to        | 1.3           | 0.17          |
|                           | <b>Game</b>          | <b>F (1,126) = 45.98</b> | <b>0.000</b>   | <b>8.3</b>     | <b>5.9</b>    | <b>to</b> | <b>10.7</b>   | <b>1.21†</b>  |

|               |               |                         |              |            |             |           |             |              |
|---------------|---------------|-------------------------|--------------|------------|-------------|-----------|-------------|--------------|
| Accelerations | Chukka x Game | F (1,126) = 1.34        | 0.249        |            |             |           |             | 0.21*        |
|               | Chukka        | F (1,126) = 3.04        | 0.084        | -4.6       | -9.9        | to        | 0.6         | 0.31*        |
|               | <b>Game</b>   | <b>F (1,126) = 8.25</b> | <b>0.005</b> | <b>7.6</b> | <b>2.4</b>  | <b>to</b> | <b>12.9</b> | <b>0.51*</b> |
| Decelerations | Chukka x Game | F (1,126) = 1.31        | 0.255        |            |             |           |             | 0.20*        |
|               | Chukka        | F (1,126) = 0.72        | 0.399        | -2.1       | -7.0        | to        | 2.8         | 0.16         |
|               | <b>Game</b>   | <b>F (1,126) = 7.84</b> | <b>0.006</b> | <b>7.0</b> | <b>2.0</b>  | <b>to</b> | <b>11.9</b> | <b>0.50*</b> |
| Impacts       | Chukka x Game | F (1,126) = 0.61        | 0.437        |            |             |           |             | 0.14         |
|               | Chukka        | F (1,126) = 0.17        | 0.683        | 0.2        | -0.6        | to        | 0.9         | 0.06         |
|               | <b>Game</b>   | <b>F (1,126) = 0.73</b> | <b>0.396</b> | <b>0.3</b> | <b>-0.4</b> | <b>to</b> | <b>1.1</b>  | <b>0.16</b>  |
|               | Chukka x Game | F (1,126) = 0.02        | 0.866        |            |             |           |             | 0.00         |

---

**Table 2 Results of factorial ANOVA for Women's Polo; Significant *p* values are presented in bold. All raw differences are calculated as WIN-LOSS. Raw differences are not provided for interaction effects. Magnitudes of effect sizes are denoted by the following symbols: \*: Small; # Moderate; † Large; ‡: Very Large.**

| Variable              | Comparison           | F                        | <i>p</i> value | Raw difference |              | CL        |              | ES           |
|-----------------------|----------------------|--------------------------|----------------|----------------|--------------|-----------|--------------|--------------|
| Duration              | Chukka               | F (1,124) = 3.80         | 0.054          | -00:36         | 00:00        | to        | 01:14        | 0.35*        |
|                       | <b>Game</b>          | <b>F (1,124) = 4.47</b>  | <b>0.037</b>   | 00:40          | 00:02        | <b>to</b> | 01:17        | <b>0.38*</b> |
| Distance              | Chukka x Game        | F (1,124) = 2.26         | 0.135          |                |              |           |              | 0.27*        |
|                       | Chukka               | F (1,124) = 0.00         | 0.984          | -1.5           | -148.9       | to        | 146.0        | 0.00         |
|                       | Game                 | F (1,124) = 0.61         | 0.435          | 58.3           | -89.2        | to        | 205.8        | 0.14         |
|                       | <b>Chukka x Game</b> | <b>F (1,124) = 4.73</b>  | <b>0.031</b>   |                |              |           |              | <b>0.39*</b> |
| Distance Speed Zone 1 | Chukka               | F (1,124) = 2.18         | 0.143          | -53.2          | -124.6       | to        | 18.2         | 0.26*        |
|                       | Game                 | F (1,124) = 0.85         | 0.359          | 33.2           | -38.2        | to        | 104.6        | 0.17         |
|                       | Chukka x Game        | F (1,124) = 0.22         | 0.637          |                |              |           |              | 0.08         |
| Distance Speed Zone 2 | Chukka               | F (1,124) = 0.19         | 0.664          | 8.7            | -30.8        | to        | 48.1         | 0.09         |
|                       | Game                 | F (1,124) = 0.74         | 0.391          | -17.2          | -56.6        | to        | 22.3         | 0.16         |
|                       | Chukka x Game        | F (1,124) = 0.74         | 0.390          |                |              |           |              | 0.16         |
| Distance Speed Zone 3 | Chukka               | F (1,124) = 0.04         | 0.847          | 3.4            | -30.9        | to        | 37.6         | 0.00         |
|                       | Game                 | F (1,124) = 0.85         | 0.360          | 15.9           | -18.3        | to        | 50.1         | 0.17         |
|                       | Chukka x Game        | F (1,124) = 0.27         | 0.604          |                |              |           |              | 0.09         |
| Distance Speed Zone 4 | Chukka               | F (1,124) = 0.34         | 0.562          | 41.5           | -99.6        | to        | 182.5        | 0.11         |
|                       | Game                 | F (1,124) = 0.22         | 0.638          | 33.6           | -107.5       | to        | 174.6        | 0.09         |
|                       | <b>Chukka x Game</b> | <b>F (1,124) = 5.88</b>  | <b>0.017</b>   |                |              |           |              | <b>0.43*</b> |
| Distance Speed Zone 5 | Chukka               | F (1,124) = 0.03         | 0.860          | -1.8           | -22.2        | to        | 18.5         | 0.00         |
|                       | Game                 | F (1,124) = 0.49         | 0.484          | -7.2           | -27.6        | to        | 13.1         | 0.13         |
|                       | Chukka x Game        | F (1,124) = 2.01         | 0.159          |                |              |           |              | 0.26*        |
| Average Speed         | Chukka               | F (1,124) = 2.33         | 0.129          | 0.71           | -0.21        | to        | 1.64         | 0.27*        |
|                       | Game                 | F (1,124) = 1.29         | 0.258          | -0.53          | -1.46        | to        | 0.39         | 0.20*        |
|                       | Chukka x Game        | F (1,124) = 1.40         | 0.238          |                |              |           |              | 0.21*        |
| Maximum Speed         | Chukka               | F (1,124) = 3.39         | 0.068          | -4.90          | -10.17       | to        | 0.37         | 0.33*        |
|                       | <b>Game</b>          | <b>F (1,124) = 41.40</b> | <b>0.000</b>   | <b>17.13</b>   | <b>11.86</b> | <b>to</b> | <b>22.40</b> | <b>1.16#</b> |
| Sprints               | Chukka x Game        | F (1,124) = 1.62         | 0.205          |                |              |           |              | 0.23*        |
|                       | Chukka               | F (1,124) = 0.00         | 0.963          | -0.1           | -2.7         | to        | 2.6          | 0.00         |

|               |               |                         |              |            |            |           |             |              |
|---------------|---------------|-------------------------|--------------|------------|------------|-----------|-------------|--------------|
|               | Game          | F (1,124) = 0.52        | 0.472        | 1.0        | 1.7        | to        | 3.6         | 0.13         |
|               | Chukka x Game | F (1,124) = 2.92        | 0.090        |            |            |           |             | 0.31*        |
| Accelerations | Chukka        | F (1,124) = 0.36        | 0.550        | -1.5       | -3.4       | to        | 6.4         | 0.11         |
|               | <b>Game</b>   | <b>F (1,124) = 4.27</b> | <b>0.041</b> | <b>5.1</b> | <b>0.2</b> | <b>to</b> | <b>10.0</b> | <b>0.37*</b> |
|               | Chukka x Game | F (1,124) = 0.48        | 0.491        |            |            |           |             | 0.13         |
| Decelerations | Chukka        | F (1,124) = 0.30        | 0.584        | 1.5        | -3.8       | to        | 6.7         | 0.09         |
|               | Game          | F (1,124) = 0.51        | 0.476        | 1.9        | -3.3       | to        | 7.1         | 0.13         |
|               | Chukka x Game | F (1,124) = 0.76        | 0.386        |            |            |           |             | 0.17         |
| Impacts       | Chukka        | F (1,124) = 0.36        | 0.552        | 0.2        | -0.5       | to        | 0.9         | 0.11         |
|               | Game          | F (1,124) = 3.03        | 0.084        | -0.6       | -1.3       | to        | 0.1         | 0.31*        |
|               | Chukka x Game | F (1,124) = 0.85        | 0.358        |            |            |           |             | 0.17         |

---
